# Supplementary material
Source: PubMed Central journal article supplement (PMC3505752)
Supplement: NIHMS420924-supplement-1.pdf [file NIHMS420924-supplement-1.pdf]

**Online Supplement Table 1:** Examples of some cardiovascular and neuropsychiatric prescription medications whose patents expired recently or will expire in the near future.

| Brand Name                    | Manufacturer                          | Generic Name                               | Drug Class                         | U.S. Patent Expiration Date [102-103]                                                                                                                                                         | USA Sales <sup>#</sup> |
|-------------------------------|---------------------------------------|--------------------------------------------|------------------------------------|-----------------------------------------------------------------------------------------------------------------------------------------------------------------------------------------------|------------------------|
| <b>CARDIOVASCULAR DRUGS</b>   |                                       |                                            |                                    |                                                                                                                                                                                               |                        |
| <b>Plavix®</b>                | Bristol-Myers Squibb / Sanofi-Aventis | Clopidogrel bisulfate                      | Anti-platelet                      | May 2012                                                                                                                                                                                      | \$6.2 Billion          |
| <b>Lipitor®</b>               | Pfizer                                | Atorvastatin calcium                       | Lipid-lowering                     | November 2011<br><i>Generic now available (Ranbaxy)</i>                                                                                                                                       | \$7.0 Billion          |
| <b>Crestor®</b>               | AstraZeneca                           | Rosuvastatin                               | Lipid-lowering                     | January 2016                                                                                                                                                                                  | \$5.7 Billion          |
| <b>Vytorin®</b>               | Schering-Plough / Merck               | Simvastatin + Ezetimibe                    | Lipid-lowering                     | March 2014<br><i>Ongoing litigation, availability may be sooner than patent expiration date</i>                                                                                               | \$2.4 Billion          |
| <b>Caduet®</b>                | Pfizer                                | Amlodipine besylate + Atorvastatin calcium | Anti-hypertensive + Lipid-lowering | June 2011<br><i>Generic now available (Ranbaxy)</i>                                                                                                                                           | \$339 Million          |
| <b>NEUROPSYCHIATRIC DRUGS</b> |                                       |                                            |                                    |                                                                                                                                                                                               |                        |
| <b>Zyprexa®</b>               | Eli Lilly                             | Olanzapine                                 | Second-Generation Antipsychotic    | October 2011<br><i>Generic now available (Tablet: Dr. Reddy's, Teva, Mylan Pharmaceuticals Inc.; Orally Disintegrating Tablet: Apotex, Dr. Reddy's, Par, Torrent; Injectable: Innopharma)</i> | \$3.3 Billion          |
| <b>Geodon®</b>                | Pfizer                                | Ziprasidone mesylate                       | Second-Generation Antipsychotic    | January 2010<br><i>Generic now available (Capsule: Apotex, Dr. Reddy's, Lupin)</i>                                                                                                            | \$1.3 Billion          |
| <b>Seroquel®</b>              | AstraZeneca                           | Quetiapine fumarate                        | Second-Generation Antipsychotic    | March 2012<br><i>Generic now available (Mylan, Teva)</i>                                                                                                                                      | \$2.9 Billion          |
| <b>Zoloft®</b>                | Pfizer                                | Sertraline hydrochloride                   | Antidepressant                     | May 2010<br><i>Generic now available (Teva)</i>                                                                                                                                               | \$539 Million          |
| <b>Cymbalta®</b>              | Eli Lilly                             | Duloxetine                                 | Antidepressant                     | June 2013                                                                                                                                                                                     | \$2.7 Billion          |
| <b>Effexor®</b>               | Wyeth / Pfizer                        | Venlafaxine HCL                            | Antidepressant                     | September 2017<br><i>Generic approved (launched after settlement with Teva, Mylan Pharmaceuticals Inc., Anchen, Aurobindo, Dr. Reddy's, Torrent)</i>                                          | \$2.7 Billion          |
| <b>Lexapro®</b>               | Forest                                | Escitalopram                               | Antidepressant                     | March 2012<br><i>Generic now available (Teva)</i>                                                                                                                                             | \$2.9 Billion          |

<sup>#</sup>Annual sales in the United States, according to medical data provider IMS Health [101]
